# Supplementary material
Source: publisher figshare collection journal article supplement (https://springernature.figshare.com/ndownloader/files/22519517)
Supplement: Supplementary file 1 [file 22519517]

Measurement(s),electric power system • public utility line
Technology Type(s),digital curation • computational modeling technique
Factor Type(s),geographic location
Sample Characteristic - Location,Earth (planet)
